# Supplementary material for: Automatic Context-Specific Subnetwork Discovery from Large Interaction Networks
Source: PubMed Central journal article supplement (PMC3877685; doi:10.1371/journal.pone.0084227), 2014-01-01
Supplement: pone.0084227.s001.pdf [file pone.0084227.s001.pdf]

# Automatic Context-Specific Subnetwork Discovery from Large Interaction Networks (Supporting Information)

Ashis Saha, Aik Choon Tan, Jaewoo Kang

## Table of Contents

|                                                                                  |          |
|----------------------------------------------------------------------------------|----------|
| <b>S1.Estimated t-score</b>                                                      | <b>2</b> |
| <b>S2.Binary Vote</b>                                                            | <b>3</b> |
| <b>S3.Dataset Download Sources</b>                                               | <b>4</b> |
| Table S1. Dataset Download Sources . . . . .                                     | 4        |
| <b>S4.An Experiment with the appropriate range</b>                               | <b>5</b> |
| Table S2. LOOCV accuracy with different appropriate ranges from KEGG . . . . .   | 5        |
| Table S3. LOOCV accuracy with different appropriate ranges from STRING . . . . . | 5        |
| <b>S5.Algorithm Illustration</b>                                                 | <b>6</b> |
| Figure S1. An illustration of the MIS generation. . . . .                        | 6        |
| <b>S6.Irregular Network Topology</b>                                             | <b>7</b> |
| Figure S2. Topology of out-of-size MISs. . . . .                                 | 7        |
| <b>S7.Representative probesets of the top MISs</b>                               | <b>8</b> |
| Table S4. Representative probesets of the top MISs from KEGG. . . . .            | 8        |
| Table S5. Representative probesets of the top MISs from STRING. . . . .          | 12       |

## S1. Estimated t-score

The Welch's t-test is a widely used metric for measuring the differential expression of a probe or gene (see Eq. S1).

$$t = \frac{\bar{X}_+ - \bar{X}_-}{\sqrt{\frac{\sigma_+^2}{n_+} + \frac{\sigma_-^2}{n_-}}} \quad (\text{S1})$$

where  $\bar{X}_+$  and  $\bar{X}_-$  are the mean expressions,  $\sigma_+$  and  $\sigma_-$  are the standard deviations, and  $n_+$  and  $n_-$  are the number of samples of positive and negative classes, respectively. The higher  $|t|$  is, the higher the differential power. We use a slightly modified version of the t-test to avoid the noise of the microarray data. We use the median instead of the mean, and we estimate the standard deviation from the interquartile range (IQR) which is defined as the difference between the upper and lower quantiles. The IQR contains 50% of the data within  $\frac{1}{2}IQR$  of the median. Our estimation comes from the *empirical rule* - about 68.2% of the values of a normal distribution lie within 1 standard deviation of the mean. The estimated standard deviation ( $\hat{\sigma}$ ) is given by Eq. S2,

$$\hat{\sigma} = \frac{1}{2} \cdot IQR \cdot \frac{68.2}{50} \quad (\text{S2})$$

So, our estimated t-test score ( $\hat{t}$ ) is given by Eq. S3.

$$\hat{t} = \frac{\tilde{X}_+ - \tilde{X}_-}{\sqrt{\frac{\hat{\sigma}_+^2}{n_+} + \frac{\hat{\sigma}_-^2}{n_-}}} \quad (\text{S3})$$

where  $\tilde{X}_+$  and  $\tilde{X}_-$  are the median expressions,  $\hat{\sigma}_+$  and  $\hat{\sigma}_-$  are the estimated standard deviations, and  $n_+$  and  $n_-$  are the number of samples of positive and negative classes, respectively. The higher  $|\hat{t}|$  is, the higher the differential power. We sort the probes of each MIS according to the absolute value of the estimated t-scores ( $|\hat{t}|$ ) in decreasing order, and select the top five probes as the representative probeset for the corresponding MIS.

## S2. Binary Vote

Binary voting is applied when the voting weights for both classes become equal, which would be very infrequent. In the binary voting system, each top MIS casts a vote in favor of either the positive or negative class, i.e., the voting weight for each class will be either 1 or 0. Comparable to weighted voting, which was described in the main paper, binary voting for a new sample is also determined from the closest cluster. The majority class in the closest cluster gets the total vote (weight=1). If  $\hat{P}_c > \hat{N}_c$ , then  $W_i(\text{positive}) = 1$  and  $W_i(\text{negative}) = 0$ . Similarly, if  $\hat{P}_c < \hat{N}_c$ , then  $W_i(\text{positive}) = 0$  and  $W_i(\text{negative}) = 1$ . If  $\hat{P}_c = \hat{N}_c$ , the voting weight is determined in the same way, from the normalized number of positive and negative samples in the next closest cluster from  $x_{new}$ , and so on. If  $T$ , the number of voting MISs, is odd, then  $W(\text{positive}) = \sum_{i=1}^T W_i(\text{positive})$  and  $W(\text{negative}) = \sum_{i=1}^T W_i(\text{negative})$  in binary voting will never be equal. If  $W(\text{positive}) > W(\text{negative})$ , the class,  $\text{binary}(x_{new})$ , predicted from the binary voting is *positive*; otherwise, it is *negative*.

$$\text{binary}(x_{new}) = \begin{cases} \text{positive} & \text{if } W(\text{positive}) > W(\text{negative}) \\ \text{negative} & \text{otherwise} \end{cases} \quad (\text{S4})$$

### S3. Dataset Download Sources

**Table S1. Dataset Download Sources**

| Dataset Name | Download Source                                                                                                                                                                                                                                                                                                                                                              |
|--------------|------------------------------------------------------------------------------------------------------------------------------------------------------------------------------------------------------------------------------------------------------------------------------------------------------------------------------------------------------------------------------|
| Leukemia     | <a href="http://www.broadinstitute.org/cgi-bin/cancer/publications/pub_paper.cgi?mode=view&amp;paper_id=43">http://www.broadinstitute.org/cgi-bin/cancer/publications/pub_paper.cgi?mode=view&amp;paper_id=43</a>                                                                                                                                                            |
| CNS          | <a href="http://www.broadinstitute.org/mpr/CNS/">http://www.broadinstitute.org/mpr/CNS/</a>                                                                                                                                                                                                                                                                                  |
| DLBCL        | <a href="http://www.broadinstitute.org/mpr/lymphoma/">http://www.broadinstitute.org/mpr/lymphoma/</a>                                                                                                                                                                                                                                                                        |
| Prostate1    | <a href="http://www.broadinstitute.org/cgi-bin/cancer/publications/pub_paper.cgi?mode=view&amp;paper_id=75">http://www.broadinstitute.org/cgi-bin/cancer/publications/pub_paper.cgi?mode=view&amp;paper_id=75</a>                                                                                                                                                            |
| Prostate3    | <a href="http://www.gnf.org/cancer/prostate">http://www.gnf.org/cancer/prostate</a> (We found the original link broken on 15th November 2013. However, an alternative source is available - <a href="http://datam.i2r.a-star.edu.sg/datasets/krbd/ProstateCancer/ProstateCancer.html">http://datam.i2r.a-star.edu.sg/datasets/krbd/ProstateCancer/ProstateCancer.html</a> .) |
| Lung         | <a href="http://datam.i2r.a-star.edu.sg/datasets/krbd/LungCancer/LungCancer-Harvard2.html">http://datam.i2r.a-star.edu.sg/datasets/krbd/LungCancer/LungCancer-Harvard2.html</a>                                                                                                                                                                                              |
| GCM          | <a href="http://www.broadinstitute.org/cgi-bin/cancer/publications/pub_paper.cgi?mode=view&amp;paper_id=61">http://www.broadinstitute.org/cgi-bin/cancer/publications/pub_paper.cgi?mode=view&amp;paper_id=61</a>                                                                                                                                                            |

## S4. An Experiment with the appropriate range

We set the appropriate range,  $[minRange, maxRange]$ , to generate the molecular interaction subnetworks. We experimented with different ranges and chose the optimal range producing the highest LOOCV accuracy over the datasets. Initially, we set  $minRange = 3, 5, 7$  and  $maxRange = 15, 20, 25$  for KEGG, and  $minRange = 5, 7, 10$  and  $maxRange = 15, 20, 25$  for STRING. Later, we expanded the range list based on the results observed. The results of the MISs with different appropriate ranges using KEGG and STRING are shown in Table S2 and S3, respectively.

**Table S2. LOOCV accuracy (%) with different appropriate ranges from KEGG\***

| Appro. Range | Leukemia    | CNS         | DLBCL       | Prostate1   | Prostate3    | Lung        | GCM         | Average     |
|--------------|-------------|-------------|-------------|-------------|--------------|-------------|-------------|-------------|
| 3-15         | 98.6        | 82.4        | 93.5        | 89.2        | 100.0        | 99.5        | 85.4        | 92.7        |
| 3-20         | 98.6        | 73.5        | 94.8        | 88.2        | 100.0        | 99.5        | 83.6        | 91.2        |
| 3-25         | 97.2        | 82.4        | 94.8        | 90.2        | 100.0        | 99.5        | 83.9        | 92.6        |
| 5-10         | 97.2        | 82.4        | 94.8        | 91.2        | 100.0        | 99.5        | 84.6        | 92.8        |
| <b>5-15</b>  | <b>98.6</b> | <b>85.3</b> | <b>93.5</b> | <b>90.2</b> | <b>100.0</b> | <b>99.5</b> | <b>85.0</b> | <b>93.2</b> |
| 5-20         | 98.6        | 70.6        | 94.8        | 88.2        | 100.0        | 99.5        | 83.6        | 90.8        |
| 5-25         | 97.2        | 82.4        | 94.8        | 90.2        | 100.0        | 99.5        | 83.9        | 92.6        |
| 5-30         | 98.6        | 82.4        | 94.8        | 89.2        | 100.0        | 99.5        | 83.9        | 92.6        |
| 7-15         | 98.6        | 76.5        | 96.1        | 88.2        | 100.0        | 99.5        | 84.6        | 91.9        |
| 7-20         | 97.2        | 82.4        | 94.8        | 87.3        | 100.0        | 99.5        | 83.6        | 92.1        |
| 7-25         | 97.2        | 85.3        | 94.8        | 88.2        | 100.0        | 99.5        | 83.6        | 92.7        |

‘Appro. Range’ denotes *appropriate range*. \* The optimal appropriate range producing the highest average LOOCV accuracy is shown in bold font.

**Table S3. LOOCV accuracy (%) with different appropriate ranges from STRING\***

| Appro. Range | Leukemia    | CNS         | DLBCL       | Prostate1   | Prostate3   | Lung        | GCM         | Average     |
|--------------|-------------|-------------|-------------|-------------|-------------|-------------|-------------|-------------|
| 5-10         | 97.2        | 82.4        | 94.8        | 91.2        | 100.0       | 81.4        | 98.9        | 92.3        |
| 5-15         | 94.4        | 85.3        | 93.5        | 88.2        | 100.0       | 83.6        | 98.9        | 92.0        |
| 5-20         | 97.2        | 76.5        | 89.6        | 91.2        | 100.0       | 82.9        | 99.5        | 91.0        |
| <b>5-25</b>  | <b>95.8</b> | <b>88.2</b> | <b>94.8</b> | <b>90.2</b> | <b>97.0</b> | <b>84.6</b> | <b>98.3</b> | <b>92.7</b> |
| 5-30         | 97.2        | 88.2        | 88.3        | 91.2        | 100.0       | 84.3        | 98.9        | 92.6        |
| 7-15         | 98.6        | 76.5        | 94.8        | 88.2        | 97.0        | 98.3        | 83.6        | 91.0        |
| 7-20         | 98.6        | 76.5        | 92.2        | 89.2        | 100.0       | 98.9        | 83.9        | 91.3        |
| 7-25         | 94.4        | 82.4        | 88.3        | 89.2        | 97.0        | 98.3        | 84.6        | 90.6        |
| 7-30         | 95.8        | 82.4        | 92.2        | 91.2        | 100.0       | 99.5        | 84.3        | 92.2        |
| 10-20        | 95.8        | 79.4        | 93.5        | 89.2        | 100.0       | 98.9        | 83.6        | 91.5        |
| 10-25        | 97.2        | 79.4        | 88.3        | 91.2        | 100.0       | 98.3        | 82.9        | 91.0        |
| 10-30        | 97.2        | 79.4        | 94.8        | 91.2        | 100.0       | 98.9        | 83.9        | 92.2        |

‘Appro. Range’ denotes *appropriate range*. \* The optimal appropriate range producing the highest average LOOCV accuracy is shown in bold font.

## S5. Algorithm Illustration

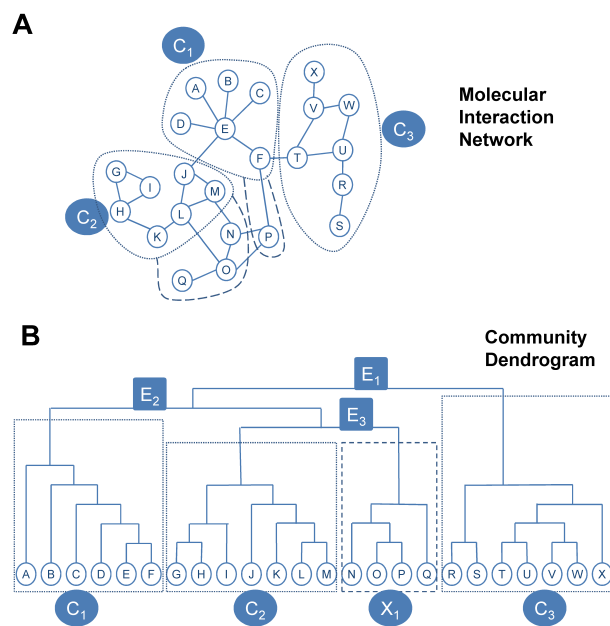

**Figure S1. An illustration of the MIS generation.** Let us consider one example of a connected molecular interaction network (MIS) and its community dendrogram as shown in the figure. Let the appropriate range be  $[5,10]$ . The size (the total number of leaf nodes) of the dendrogram is 24. As it is greater than the *maxRange* (10), we divide the dendrogram by removing edge  $E_1$  so we are left with two dendrograms (A-Q and R-X). The right dendrogram's (R-X) size is 7 ( $5 \leq 7 \leq 10$ ), so we take it as an appropriate community ( $C_3$ ). However, because the left dendrogram's (A-Q) size is above 10, we divide it again by removing edge  $E_2$ . We have to further divide the dendrogram by removing edge  $E_3$ . Thus we get four parts of the original community dendrogram –  $C_1$ ,  $C_2$ ,  $X_1$ , and  $C_3$ . Three of their sizes fall within the appropriate range  $[5,10]$  ( $C_1$ ,  $C_2$ , and  $C_3$ ), so we take them as appropriate communities. However, because  $X_1$ 's size is less than 5, we discard it. Now, we shall assign the nodes in  $X_1$  – N, O, P, and Q – individually to their closest communities from the original network. P is 1-hop away from  $C_1$ , so P is merged with  $C_1$ ; N and O are 1-hop away from  $C_2$ , so they are merged with  $C_2$ . In the next iteration, Q is merged with its closest community,  $C_2$ . Thus, we get three MISs –  $C_1$  (A,B,C,D,E,F,P),  $C_2$  (G,H,I,J,K,L,M,N,O,Q), and  $C_3$  (R,S,T,U,V,W,X).

## S6. Irregular Network Topology

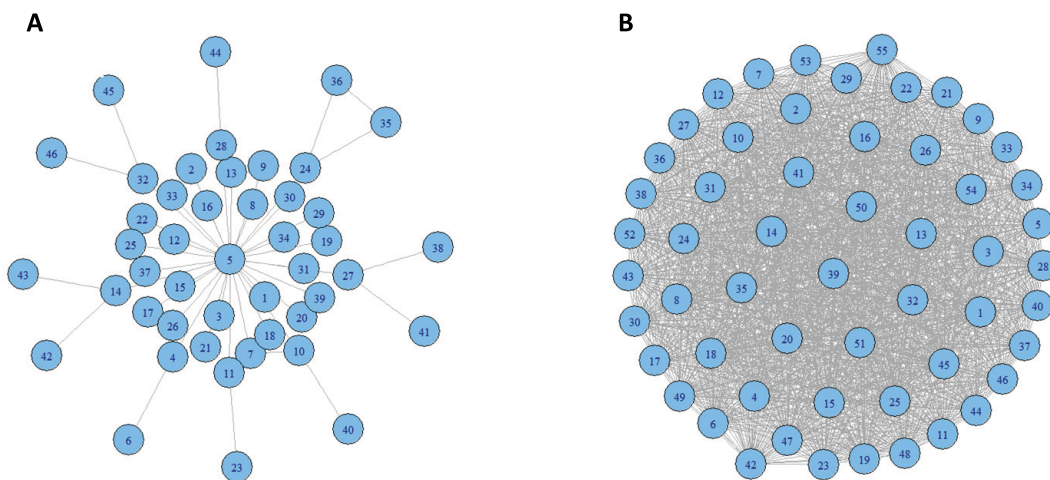

**Figure S2. Topology of two out-of-size MISs generated with an appropriate range of 5-15 from STRING network. A) MIS with 46 nodes has a star topology. B) MIS with 55 nodes is too dense.**

## S7. Representative probesets of the top MISs

**Table S4. Representative probesets of the top MISs from KEGG.** MISs generated from KEGG have been ranked by COSSY using all the samples in a dataset, and the representative probesets of the top T MISs have been reported where T is the number of MISs to vote that produced the highest LOOCV accuracy. Each probeset’s ID is followed by the corresponding gene symbol in parentheses.

| Dataset  | T  | Rank | Representative probeset of MIS [probeid(gene symbol)]                                                    |
|----------|----|------|----------------------------------------------------------------------------------------------------------|
| Leukemia | 15 | 1    | D87459_at(WASF1), M19283_at(ACTG1), L33075_at(IQGAP1),<br>X74008_at(PPP1CC), X95735_at(ZYX)              |
|          |    | 2    | X64072_s_at(ITGB2), M15395_at(ITGB2), M81695_s_at(ITGAX),<br>X80907_at(PIK3R2), X51521_at(EZR)           |
|          |    | 3    | D16469_at(ATP6AP1), L09717_at(LAMP2), M63138_at(CTSD),<br>S46622_at(PPP3CC), Z46973_at(PIK3C3)           |
|          |    | 4    | M16038_at(LYN), U14588_at(PXN), X80907_at(PIK3R2),<br>X04526_at(GNB1), X77748_at(GRM3)                   |
|          |    | 5    | U46499_at(MGST1), U77604_at(MGST2), Y00433_at(GPX1),<br>U21689_at(GSTP1), M81118_at(ADH5)                |
|          |    | 6    | M22898_at(TP53), U22376_cds2_s_at(MYB), M65214_s_at(TCF3),<br>M38449_s_at(TGFB1), M31523_at(TCF3)        |
|          |    | 7    | U14588_at(PXN), M24283_at(ICAM1), X06318_at(PRKCB),<br>S72869_at(CCDC6), X77548_at(NCOA4)                |
|          |    | 8    | M16038_at(LYN), M64595_at(RAC2), M89957_at(CD79B),<br>U05259_rna1_at(CD79A), X16316_at(VAV1)             |
|          |    | 9    | U29656_at(NME3), U52427_rna1_at(POLR2G), X15357_at(NPR1),<br>X66533_at(GUCY1B3), Y07604_at(NME4)         |
|          |    | 10   | M63167_at(AKT1), X80907_at(PIK3R2), M18255_cds2_s_at(PRKCB),<br>M84371_rna1_s_at(CD19), X06318_at(PRKCB) |
|          |    | 11   | D10495_at(PRKCD), M14676_at(FYN), M16038_at(LYN),<br>M33195_at(FCER1G), X06318_at(PRKCB)                 |
|          |    | 12   | L09708_at(C2), M84526_at(CFD), X05309_at(CR1),<br>M13690_s_at(SERPING1), U28488_s_at(C3AR1)              |
|          |    | 13   | M27281_at(VEGFA), U09578_at(MAPKAPK3), U14588_at(PXN),<br>X80907_at(PIK3R2), Z29090_at(PIK3CA)           |
|          |    | 14   | L05147_at(DUSP3), M22898_at(TP53), X66867_cds1_at(MAX),<br>L08895_at(MEF2C), D11327_s_at(PTPN7)          |
|          |    | 15   | M95678_at(PLCB2), U03090_at(PLA2G5), X04828_at(GNAI2),<br>U38545_at(PLD1), X51521_at(EZR)                |
| CNS      | 7  | 1    | J04177_at(COL11A1), M55210_at(LAMC1), Z26653_at(LAMA2),<br>Z74616_s_at(COL1A2), X79683_s_at(LAMB2)       |
|          |    | 2    | M81933_at(CDC25A), U31814_at(HDAC2), U18422_at(TFDP2),<br>L40386_s_at(TFDP2), S49592_s_at(E2F1)          |
|          |    | 3    | M55210_at(LAMC1), X79683_s_at(LAMB2), X07979_at(ITGB1),<br>U04806_s_at(FLT3LG), L32137_at(COMP)          |
|          |    | 4    | J04111_at(JUN), M92287_at(CCND3), L00058_at(MYC),<br>M25269_at(ELK1), M14745_at(BCL2)                    |
|          |    | 5    | L36033_at(CXCL12), U09303_at(EFNB1), U27655_at(RGS3),<br>U81262_at(EFNB2), L06797_s_at(CXCR4)            |



|           |    |                                                                                                       |
|-----------|----|-------------------------------------------------------------------------------------------------------|
|           | 6  | D25538_at(ADCY7), L21993_at(ADCY2), M82919_at(GABRB3),<br>X15376_at(GABRG2), U73304_rna1_at(CNR1)     |
|           | 7  | J04177_at(COL11A1), M60299_at(COL2A1), Z74616_s_at(COL1A2),<br>L32137_at(COMP), X07979_at(ITGB1)      |
| DLBCL     | 7  | 1 S74728_at(ALDH7A1), U40369_rna1_at(SAT1), X05409_at(ALDH2),<br>Z49099_at(SMS), M34338_s_at(SRM)     |
|           | 2  | X13444_at(LOC100996919), X56841_at(HLA-E), D49824_s_at(HLA-B),<br>M94880_f_at(HLA-H), X57522_at(TAP1) |
|           | 3  | D21063_at(MCM2), D55716_at(MCM7), D84557_at(MCM6),<br>U77949_at(CDC6), X74795_at(MCM5)                |
|           | 4  | L33801_at(GSK3B), M80335_at(PRKACA), U37352_at(PPP2R5C),<br>X12791_at(APC), M60483_rna1_s_at(PPP2CA)  |
|           | 5  | U21090_at(POLD2), X17620_at(NME1), X56494_at(PKM),<br>X59543_at(RRM1), M80397_s_at(POLD1)             |
|           | 6  | D31797_at(CD40LG), L33801_at(GSK3B), L41067_at(NFATC3),<br>M37815_cds1_at(CD28), M95936_s_at(AKT2)    |
|           | 7  | D90084_at(PDHA1), J04173_at(PGAM1), X02152_at(LDHA),<br>X56494_at(PKM), M14328_s_at(ENO1)             |
| Prostate1 | 29 | 1 37599_at(AOX1), 40071_at(CYP1B1), 41772_at(MAOA),<br>32747_at(ALDH2), 859_at(CYP1B1)                |
|           | 2  | 34915_at(SLC8A1), 40435_at(SLC25A6), 40436_g_at(SLC25A6),<br>39123_s_at(TRPC1), 39124_r_at(TRPC1)     |
|           | 3  | 39775_at(SERPING1), 40766_at(C4A), 32249_at(CFHR1),<br>38441_s_at(CD46), 40282_s_at(CFD)              |
|           | 4  | 41867_at(CREB3L1), 33134_at(ADCY3), 1909_at(BCL2),<br>41288_at(CALM3), 364_s_at(PLCB3)                |
|           | 5  | 39939_at(COL4A6), 32667_at(COL4A5), 41755_at(COBL1),<br>37912_at(TRAF4), 38042_at(PRKCA)              |
|           | 6  | 41867_at(CREB3L1), 37733_at(MAPK14), 38042_at(PRKCA),<br>41288_at(CALM3), 1708_at(MAPK10)             |
|           | 7  | 31824_at(ME1), 35216_at(ME3), 33819_at(LDHB), 41485_at(LDHA),<br>837_s_at(ME1)                        |
|           | 8  | 32747_at(ALDH2), 37707_i_at(ADH5), 37708_r_at(ADH5),<br>36686_at(ALDH1A3), 38780_at(AKR1A1)           |
|           | 9  | 37186_s_at(ABP1), 41772_at(MAOA), 32747_at(ALDH2),<br>36132_at(ALDH7A1), 36686_at(ALDH1A3)            |
|           | 10 | 33710_at(LPCAT3), 38262_at(MBOAT2), 39396_at(LYPLA1),<br>34797_at(PPAP2A), 38098_at(LPIN1)            |
|           | 11 | 40162_s_at(COMP), 40163_r_at(COMP), 103_at(THBS4),<br>1767_s_at(TGFB3), 34342_s_at(SPP1)              |
|           | 12 | 39054_at(GSTM4), 33396_at(GSTP1), 1120_at(GSTM3), 820_at(MGST2),<br>556_s_at(GSTM4)                   |
|           | 13 | 33994_g_at(MYL6), 32755_at(ACTA2), 41288_at(CALM3),<br>38298_at(KCNMB1), 33134_at(ADCY3)              |
|           | 14 | 34138_at(GNAO1), 38042_at(PRKCA), 41288_at(CALM3),<br>1336_s_at(PRKCB), 36918_at(GUCY1A3)             |
|           | 15 | 34637_f_at(ADH1A), 38315_at(ALDH1A2), 40782_at(DHRS3),<br>37707_i_at(ADH5), 37708_r_at(ADH5)          |
|           | 16 | 40682_at(GYS2), 37221_at(PRKAR2B), 39366_at(PPP1R3C),<br>37725_at(PPP1CC), 41288_at(CALM3)            |

|           |    |    |                                                 |                                                    |
|-----------|----|----|-------------------------------------------------|----------------------------------------------------|
|           |    | 17 | AFFX-HUMGAPDH/M33197_M.at(GAPDH),               | 33819_at(LDHB),                                    |
|           |    |    | 40193_at(ENO2), 41485_at(LDHA), 2035_s.at(ENO1) |                                                    |
|           |    | 18 | 36917_at(LAMA2),                                | 36929_at(LAMB3), 41755_at(COBLL1),                 |
|           |    |    | 33410_at(ITGA6), 37671_at(LAMA4)                |                                                    |
|           |    | 19 | 34118_at(ATP1B2),                               | 32225_at(ATP1A1), 34377_at(ATP1A2),                |
|           |    |    | 39356_at(NEDD4L), 34915_at(SLC8A1)              |                                                    |
|           |    | 20 | 1767_s.at(TGFB3),                               | 1735_g.at(TGFB3), 1262_s.at(TGFB2),                |
|           |    |    | 41140_at(IFNGR2), 1038_s.at(IFNGR1)             |                                                    |
|           |    | 21 | 1767_s.at(TGFB3),                               | 1622_at(MAP2K3), 857_at(PPM1A),                    |
|           |    |    | 37408_at(MRC2), 806_at(PLK3)                    |                                                    |
|           |    | 22 | 36686_at(ALDH1A3),                              | 37708_r.at(ADH5), 1120_at(GSTM3),                  |
|           |    |    | 556_s.at(GSTM4), 40071_at(CYP1B1)               |                                                    |
|           |    | 23 | 41385_at(EPB41L3),                              | 38042_at(PRKCA), 1336_s.at(PRKCB),                 |
|           |    |    | 208_at(CTNNA2), 36174_at(MARCKSL1)              |                                                    |
|           |    | 24 | 35649_at(CDO1),                                 | 33819_at(LDHB), 36123_at(TST), 36124_at(MPST),     |
|           |    |    | 41485_at(LDHA)                                  |                                                    |
|           |    | 25 | 40435_at(SLC25A6),                              | 40436_g.at(SLC25A6), 35818_at(CYCS),               |
|           |    |    | 486_at(CASP9), 32806_at(TSPO)                   |                                                    |
|           |    | 26 | 41422_at(DPYS),                                 | 37193_at(MIR3658), 37351_at(UPP1), 33815_at(UMPS), |
|           |    |    | 37203_at(CES1)                                  |                                                    |
|           |    | 27 | 34145_at(TLR6),                                 | 36243_at(TLR1), 40310_at(TLR2), 37720_at(HSPD1),   |
|           |    |    | 41510_s.at(HSPA9)                               |                                                    |
|           |    | 28 | 37229_at(ATR),                                  | 36645_at(RELA), 1767_s.at(TGFB3), 1295_at(RELA),   |
|           |    |    | 1100_at(IRAK1)                                  |                                                    |
|           |    | 29 | 1661_i.at(KLK3),                                | 1513_at(KLK3), 1514_g.at(KLK3), 442_at(MIR3652),   |
|           |    |    | 1664_at(IGF2)                                   |                                                    |
| Prostate3 | 3  | 1  | 32962_at(CTH),                                  | 33819_at(LDHB), 35343_at(GOT1), 36124_at(MPST),    |
|           |    |    | 41485_at(LDHA)                                  |                                                    |
|           |    | 2  | 40372_at(PNLIPRP1),                             | 38003_s.at(DGKZ), 39044_s.at(DGKD),                |
|           |    |    | 33862_at(PPAP2B), 38098_at(LPIN1)               |                                                    |
|           |    | 3  | 35118_at(LCAT),                                 | 33710_at(LPCAT3), 35228_at(CHKB),                  |
|           |    |    | 39396_at(LYPLA1), 41176_at(LPCAT1)              |                                                    |
| Lung      | 7  | 1  | 34664_at(FCGR2B),                               | 35822_at(CFB), 39409_at(C1R), 40496_at(C1S),       |
|           |    |    | 40766_at(C4A)                                   |                                                    |
|           |    | 2  | 33904_at(CLDN3),                                | 35276_at(CLDN4), 35630_at(LLGL2),                  |
|           |    |    | 38482_at(CLDN7), 40973_at(PARD3)                |                                                    |
|           |    | 3  | 35330_at(FLNC),                                 | 36354_at(TNN), 36917_at(LAMA2), 36929_at(LAMB3),   |
|           |    |    | 881_at(ITGB6)                                   |                                                    |
|           |    | 4  | 1810_s.at(PRKCD),                               | 32046_at(PRKCD), 33833_at(SPTAN1),                 |
|           |    |    | 767_at(MYH11), 774_g.at(MYH11)                  |                                                    |
|           |    | 5  | 1810_s.at(PRKCD),                               | 32046_at(PRKCD), 41645_at(PLA2G6),                 |
|           |    |    | 33245_at(MAPK13), 33804_at(PTK2B)               |                                                    |
|           |    | 6  | 1108_s.at(EPHA1),                               | 2039_s.at(FYN), 34329_at(PAK2), 39930_at(EPHB6),   |
|           |    |    | 40425_at(EFNA1)                                 |                                                    |
|           |    | 7  | 1810_s.at(PRKCD),                               | 32046_at(PRKCD), 33162_at(INSR), 41049_at(IRS1),   |
|           |    |    | 851_s.at(IRS1)                                  |                                                    |
| GCM       | 23 | 1  | X04828_at(GNAI2),                               | X70297_at(CHRNA7), Y10141_s.at(SLC6A3),            |
|           |    |    | AA278775_at(APLP2), RC_AA459690_s.at(MPC1)      |                                                    |

2 M58603\_at(NFKB1), U33053\_at(PKN1), U70451\_at(MYD88),  
 S75881\_s\_at(MYBL1), H39589\_at(COQ4)  
 3 L76191\_at(IRAK1), M11717\_rna1\_at(HSPA1B), X51757\_at(HSPA6),  
 AA489287\_at(FBXO16), RC\_AA398708\_at(SEPT7)  
 4 L11285\_at(MAP2K2), M21574\_at(PDGFRA), X02751\_at(NRAS),  
 X04828\_at(GNAI2), RC\_AA147646\_s\_at(METTTL7A)  
 5 D00632\_at(GPX3), Y00433\_at(GPX1), L16991\_at-2(CYP2C9), M30185\_at-  
 2(CYP2B6), U78310\_at(PES1)  
 6 D43767\_at(CCL17), U85767\_at(CCL23), X04828\_at(GNAI2),  
 X55989\_rna1\_at(ECRP), U75285\_rna1\_at(BIRC5)  
 7 M21056\_at(PLA2G1B), M34667\_at(PLCG1), U61538\_at(CHP1),  
 U79271\_at(AKT3), RC\_AA609519\_at(MSRA)  
 8 L11005\_at(AOX1), U89606\_at(PDXK), RC\_AA400074\_at(DOCK8),  
 RC\_AA426643\_at(RSL1D1), RC\_AA428608\_at(ROGDI)  
 9 M22995\_at(RAP1A), M34667\_at(PLCG1), Z15114\_at(PRKCG),  
 M24485\_s\_at(GSTP1), W69543\_at(SCML1)  
 10 L01087\_at(PRKCQ), L11285\_at(MAP2K2), M34353\_s\_at(ROS1),  
 M34667\_at(PLCG1), RC\_AA029462\_at(RALGAPA2)  
 11 X55733\_at(EIF4B), M33666\_at(PSG6), M61733\_at-2(RPS6KB1),  
 RC\_AA400766\_at(KIAA0556), RC\_AA416601\_s\_at(ULK3)  
 12 X81817\_at(BCAP31), Z12830\_at(SSR1), AA093396\_at(PHGDH),  
 T69384\_at(PER1), RC\_AA443342\_s\_at(TMEM203)  
 13 M21186\_at(CYBA), M55067\_at(NCF1B), X77094\_at(NCF4),  
 M30448\_s\_at(FBL), U05875\_at(IFNGR2)  
 14 M16038\_at(LYN), M34667\_at(PLCG1), U20158\_at(LCP2),  
 U78027\_rna4\_at(BTK), X06948\_at(FCER1A)  
 15 L76191\_at(IRAK1), U91616\_at(NFKBIE), X69550\_at(ARHGDI),  
 HG3996-HT4266\_at(ARHGDIB), RC\_AA261907\_at(REXO2)  
 16 M11717\_rna1\_at(HSPA1B), X51757\_at(HSPA6), AA465601\_at(ARFIP1),  
 X15875\_at(ATF2), AA422159\_at(DOHH)  
 17 D31766\_at(GNPDA1), RC\_AA035284\_at(PDZRN3),  
 RC\_AA210695\_at(PARP14), RC\_AA429655\_at(TPCN1),  
 RC\_AA449479\_at(BZW2)  
 18 U10473\_s\_at(B4GALT1), U28014\_at(CASP4), RC\_AA429655\_at(TPCN1),  
 RC\_AA443841\_at(SPRY2), R93273\_s\_at(UXS1)  
 19 X16663\_at(HCLS1), X01677\_f\_at(GAPDH), V00565\_s\_at-2(ACTB),  
 RC\_AA402656\_at(ZCCHC24), RC\_AA609519\_at(MSRA)  
 20 U67733\_at(PDE2A), Y00486\_rna1\_at(APRT), AA318315\_at(C6orf106),  
 RC\_AA609873\_at(NECAB3), M91029\_cds2\_at(AMPD2)  
 21 L11285\_at(MAP2K2), M22995\_at(RAP1A), M95712\_at(BRAF),  
 X02751\_at(NRAS), AA278775\_at(APLP2)  
 22 M21056\_at(PLA2G1B), X04828\_at(GNAI2), F07806\_at(GNAZ),  
 RC\_AA193204\_at(SORBS2), M16038\_at(LYN)  
 23 M95740\_at(IDUA), U03735\_f\_at(MAGEA6), RC\_AA193204\_at(SORBS2),  
 L33798\_at(CACNA1S), RC\_AA459690\_s\_at(MPC1)

---

**Table S5. Representative probesets of the top MISs from STRING.** MISs generated from STRING have been ranked by COSSY using all the samples in a dataset, and the representative probesets of the top T MISs have been reported where T is the number of MISs to vote that produced the highest LOOCV accuracy. Each probeset's ID is followed by the corresponding gene symbol in parentheses.

| Dataset  | T  | Rank | Representative probeset of MIS [probeid(gene symbol)]                                                    |
|----------|----|------|----------------------------------------------------------------------------------------------------------|
| Leukemia | 5  | 1    | L21954_at(TSPO), M54992_at(CD72), U05259_rna1_at(CD79A),<br>X07743_at(PLEK), X97267_rna1_s_at(PTPRCAP)   |
|          |    | 2    | J03473_at(PARP1), U25435_at(CTCF), X99585_at(SUMO2),<br>Z15115_at(TOP2B), M27504_s_at(TOP2B)             |
|          |    | 3    | X92106_at(BLMH), Z23064_at(SNORD61), Z93784_at(ATXN10),<br>M21535_at(ERG), L09209_s_at(APLP2)            |
|          |    | 4    | L09717_at(LAMP2), M22960_at(CTSA), M74524_at(UBE2A),<br>U76992_at(HTATSF1), S79873_s_at(LAMP2)           |
|          |    | 5    | D87465_at(SPOCK2), D83646_at(MMP16), U14394_at(TIMP3),<br>D50477_s_at(MMP16), M32304_s_at(TIMP2)         |
| CNS      | 5  | 1    | L27560_at(IGFBP5), L42450_at(PDK1), M14745_at(BCL2),<br>M65062_at(IGFBP5), M62782_s_at(IGFBP5)           |
|          |    | 2    | X04143_at(BGLAP), Z74615_at(COL1A1), D13666_s_at(POSTN),<br>Z74616_s_at(COL1A2), M55998_s_at(COL1A1)     |
|          |    | 3    | D14838_at(FGF9), L40027_at(GSK3A), M93650_at(PAX6),<br>U07223_at(CHN2), X14474_at(MAPT)                  |
|          |    | 4    | L06139_at(TEK), M55593_at(MMP2), U89336_cds3_at(AGER),<br>X57766_at(MMP11), U31903_s_at(ATF6B)           |
|          |    | 5    | M19720_rna2_at(MYCL1), M95929_at(SFXN3), U22377_at(RLF),<br>L00058_at(MYC), L07648_at(MXII)              |
| DLBCL    | 17 | 1    | D78134_at(CIRBP), U23803_at(HNRNPA0), M60784_s_at(SNRPA),<br>X15729_s_at(DDX5), X74874_rna1_s_at(POLR2A) |
|          |    | 2    | J04615_at(SNURF), U08377_at(SFSWAP), U81001_at(SNURF),<br>Z69915_at(RBMXL1), X17567_s_at(SNRPB)          |
|          |    | 3    | D21063_at(MCM2), D80008_at(GINS1), U77949_at(CDC6),<br>U37426_at(KIF11), X85137_s_at(KIF11)              |
|          |    | 4    | J03909_at(IFI30), U15590_at(HSPB3), X03934_at(CD3D),<br>X04145_at(CD3G), M23323_s_at(CD3E)               |
|          |    | 5    | D38553_at(NCAPH), D79997_at(MELK), M74558_at(STIL),<br>X51688_at(CCNA2), X67155_at(KIF23)                |
|          |    | 6    | D87292_at(TST), X02152_at(LDHA), X05409_at(ALDH2),<br>Z22548_at(PRDY2), M34338_s_at(SRM)                 |
|          |    | 7    | J04988_at(HSP90AB1), U12595_at(TRAP1), U24169_at(AIMP2),<br>U41387_at(DDX21), X75861_at(TMBIM6)          |
|          |    | 8    | D31890_at(KARS), M63180_at(TARS), U07424_at(FARSA),<br>U09510_s_at(GARS), U09587_at(GARS)                |
|          |    | 9    | U80040_at(ACO2), V00572_at(PGK1), X07834_at(SOD2),<br>Z68129_cds1_at(IDH3G), X65965_s_at(SOD2)           |
|          |    | 10   | AB003177_at(PSMD9), D26599_at(PSMB2), D38047_at(PSMD8),<br>D78151_at(PSMD2), X71874_cds1_at(PSMB10)      |
|          |    | 11   | K02268_at(PDYN), L42324_at(GPR18), U94320_at(NPY5R),<br>L07615_at(NPY1R), U28488_s_at(C3AR1)             |

|           |    |                                                                              |                                                                                                        |                                                                                                                                 |
|-----------|----|------------------------------------------------------------------------------|--------------------------------------------------------------------------------------------------------|---------------------------------------------------------------------------------------------------------------------------------|
|           | 12 | D64142_at(H1FX),<br>M68520_at(CDK2), X03473_at(H1F0)                         | D83243_at(NPAT),<br>M37033_at(CD53),<br>X62466_at(CD52), U19557_s_at(SERPINB4)                         | L29008_at(SORD),<br>M60830_at(EVI2B),<br>U46692_rna1_at(CSTB),<br>J03798_at(SNRPD1),<br>L16991_at(DTYMK),<br>U65410_at(MAD2L1), |
|           | 13 | M33195_at(FCER1G),<br>D90084_at(PDHA1),<br>X56494_at(PKM), L12760_s_at(PCK1) | D90086_at(PDHB),<br>D21262_at(NOLC1),<br>D25218_at(RRS1),<br>U10323_at(ILF2), X70683_at(SOX4)          |                                                                                                                                 |
|           | 14 | D00596_at(TYMS),<br>X53793_at(PAICS), X59543_at(RRM1)                        | D25547_at(PCMT1),<br>D14811_at(MAD2L1BP),<br>M86699_at(TTK),<br>U96131_at(TRIP13), L40384_s_at(TRIP13) |                                                                                                                                 |
| Prostate1 | 17 | 1                                                                            | 39640_at(GFPT2),<br>37720_at(HSPD1), 41485_at(LDHA)                                                    | 39729_at(PRDX2),<br>32747_at(ALDH2),                                                                                            |
|           |    | 2                                                                            | 34602_at(FCN2),<br>40778_at(HSD17B10), 35277_at(SPON1)                                                 | 37085_g_at(LYZL6),<br>39590_at(APBA2),                                                                                          |
|           |    | 3                                                                            | 41115_s_at(BAIAP3),<br>828_at(PTGER2), 216_at(PTGDS)                                                   | 36943_r_at(PLAGL1),<br>38406_f_at(PTGDS),                                                                                       |
|           |    | 4                                                                            | 39939_at(COL4A6),<br>34391_at(IGBP1), 753_at(NID2)                                                     | 32667_at(COL4A5),<br>37890_at(CD47),                                                                                            |
|           |    | 5                                                                            | 35497_at(TSPAN2),<br>1980_s_at(NME2), 1248_at(POLR2H)                                                  | 35631_at(POLR2H),<br>33415_at(NME2),                                                                                            |
|           |    | 6                                                                            | 39701_at(PEG3),<br>40856_at(SERPINF1), 38108_at(EGFL8)                                                 | 39755_at(XBP1),<br>39756_g_at(XBP1),                                                                                            |
|           |    | 7                                                                            | 39353_at(HSPE1), 33904_at(CLDN3),<br>575_s_at(EPCAM)                                                   | 34348_at(SPINT2), 1513_at(KLK3),                                                                                                |
|           |    | 8                                                                            | 41627_at(SDF2),<br>38059_g_at(DPT)                                                                     | 32051_at(ALG8), 36897_at(MLC1),<br>38057_at(DPT),                                                                               |
|           |    | 9                                                                            | 39054_at(GSTM4),<br>556_s_at(GSTM4)                                                                    | 1289_at(GSTM5), 1120_at(GSTM3),<br>820_at(MGST2),                                                                               |
|           |    | 10                                                                           | 38950_r_at(MMP23B),<br>41250_at(AIMP2), 1199_at(SNORA48)                                               | 35306_at(DHX15),<br>35766_at(KRT18),                                                                                            |
|           |    | 11                                                                           | 33328_at(HEG1), 35218_at(PDCD10),<br>38634_at(RBP1)                                                    | 35695_at(LYST), 35696_s_at(LYST),                                                                                               |
|           |    | 12                                                                           | 32288_r_at(KLRC3),<br>40775_at(ITM2A), 41237_at(HLA-A)                                                 | 32297_s_at(KLRC1),<br>40024_at(STAC),                                                                                           |
|           |    | 13                                                                           | 36252_at(CTF1),<br>36939_at(GPM6A), 1929_at(ANGPT1)                                                    | 39315_at(ANGPT1),<br>32640_at(ICAM1),                                                                                           |
|           |    | 14                                                                           | 35071_s_at(GMDS),<br>41242_at(UAP1)                                                                    | 35214_at(UGDH), 36515_at(GNE),<br>36936_at(TSTA3),                                                                              |
|           |    | 15                                                                           | 36780_at(CLU),<br>1389_at(MME)                                                                         | 36690_at(NR3C1), 37658_at(GAS6),<br>1598_g_at(GAS6),                                                                            |
|           |    | 16                                                                           | 34608_at(SNORD95),<br>39123_s_at(TRPC1), 39124_r_at(TRPC1)                                             | 34609_g_at(SNORD95),<br>37343_at(ITPR3),                                                                                        |
|           |    | 17                                                                           | 34735_at(ROCK1),<br>40512_at(CHN1), 1647_at(IQGAP2)                                                    | 37276_at(IQGAP2),<br>38292_at(HOMER2),                                                                                          |
| Prostate3 | 5  | 1                                                                            | 41640_at(YIPF1),<br>32542_at(FHL1)                                                                     | 34870_at(LDB3), 38422_s_at(FHL2),<br>38736_at(WDR1),                                                                            |
|           |    | 2                                                                            | 37832_at(MMACHC),<br>794_at(PTPN6)                                                                     | 41191_at(PALLD), 41195_at(LPP),<br>1832_at(MCC),                                                                                |

|      |    |    |                                                                                                              |
|------|----|----|--------------------------------------------------------------------------------------------------------------|
|      |    | 3  | 41626_at(TIMELESS), 37646_at(POLD3), 35326_at(YIF1A),<br>1470_at(POLD2), 860_at(MSH2)                        |
|      |    | 4  | 37809_at(HOXA9), 41388_at(MEIS2), 32063_at(PBX1), 40763_at(MEIS1),<br>33355_at(PBX1)                         |
|      |    | 5  | 40118_at(ZNF3), 33454_at(AGRN), 34377_at(ATP1A2),<br>37669_s_at(ATP1B1), 39526_at(PAIP2B)                    |
| Lung | 5  | 1  | 1500_at(WT1), 34218_at(SPEG), 376_at(SEMA3C), 377_g_at(SEMA3C),<br>977_s_at(CDH1)                            |
|      |    | 2  | 1661_i_at(KLK3), 1662_r_at(KLK3), 33904_at(CLDN3), 38482_at(CLDN7),<br>575_s_at(EPCAM)                       |
|      |    | 3  | 2056_at(FGFR1), 2057_g_at(FGFR1), 36522_at(CRTC1),<br>39750_at(PARVA), 39930_at(EPHB6)                       |
|      |    | 4  | 1237_at(IER3), 33243_at(TNFAIP8), 33900_at(FSTL3),<br>35694_at(MAP4K4), 37716_at(CD200)                      |
|      |    | 5  | 1564_at(AKT1), 1616_at(FGF9), 32260_at(PEA15), 36095_at(CLIP3),<br>36418_at(PRICKLE3)                        |
| GCM  | 11 | 1  | D84110_at(RBPMS), L40393_at(NUMB), R78309_at(ATXN1L),<br>RC_AA280004_at(QKI), RC_AA291162_at(SPEN)           |
|      |    | 2  | X14850_at(H2AFX), Y10262_s_at(EYA3), AA252929_at(H2AFX),<br>AA418662_at(RINT1), RC_AA599683_at(EYA3)         |
|      |    | 3  | X67337_at(CPSF6), X76770_at(PAPOLA), AA259021_s_at(MLLT6),<br>RC_AA179826_at(TSEN15), RC_AA463934_at(SF3B4)  |
|      |    | 4  | L17131_rna1_at(HMGA1), U47054_at(ART3), AA044715_at(ZFR),<br>RC_AA256263_at(HNRNPH3), RC_AA449974_at(SEPT4)  |
|      |    | 5  | AB000816_s_at(ARNTL), T69384_at(PER1), W69582_at(FBXW11),<br>RC_AA481037_at(PER3), RC_AA488844_f_at(FBXL3)   |
|      |    | 6  | L34219_at(RLBP1), M35128_at(CHRM1), M21142_cds2_s_at(GNAS),<br>AF007216_at(SLC4A4), RC_AA452263_at(GNA11)    |
|      |    | 7  | U33053_at(PKN1), Z80787_at(HIST4H4), AA018847_at(NLK),<br>AA287291_at(IWS1), RC_AA194257_f_at(BRD1)          |
|      |    | 8  | Z97054_xpt2_at(HUWE1), AA278775_at(APLP2), AA477046_at(UBA6),<br>RC_AA069456_at(PJA2), RC_AA402613_at(PELI3) |
|      |    | 9  | U22055_at(SND1), AA028976_at(DLC1), RC_AA233257_at(TGFB1I1),<br>RC_AA487576_at(SDPR), RC_AA496366_at(TNS1)   |
|      |    | 10 | D78134_at(CIRBP), L38696_at(RALY), U03891_at(APOBEC3B),<br>X92715_at(ZNF74), M60784_s_at(SNRPA)              |
|      |    | 11 | U08815_at(SF3A3), U15782_at(CSTF3), X13482_at(SNRPA1),<br>X16135_at(HNRNPL), H58970_at(CPSF2)                |
